# Supplementary material
Source: PubMed Central journal article supplement (PMC3970423)
Supplement: NIHMS557947-supplement-1.pdf [file NIHMS557947-supplement-1.pdf]

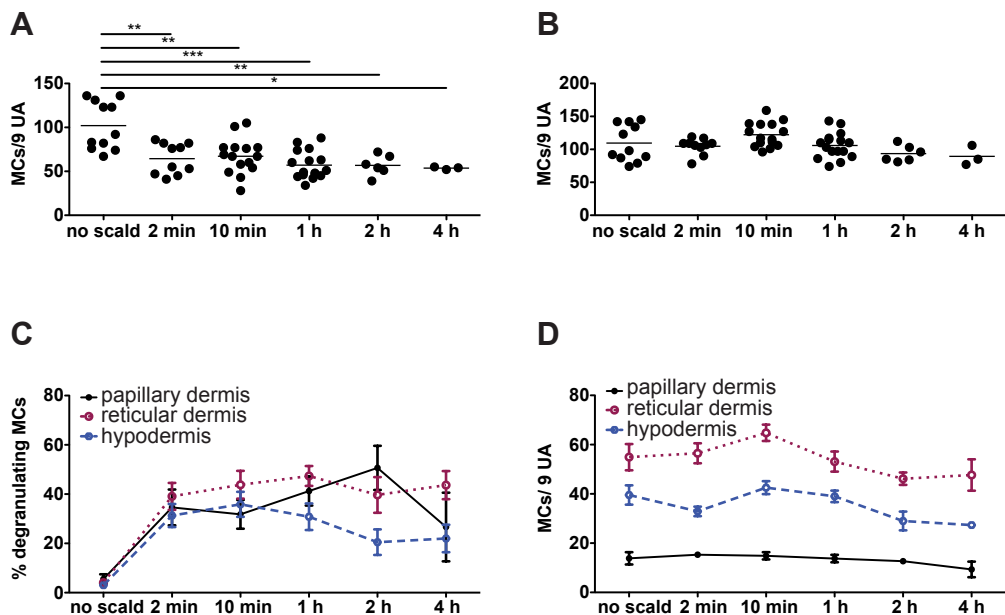

**SUPPLEMENTAL FIGURE 1.** The total numbers of skin MCs remains unchanged after thermal challenge. (A) Intact MC numbers decrease after thermal injury in parallel with increasing numbers of degranulating MC for the same mice depicted in Fig. 1B. Each dot is a separate mouse and bar indicates mean value. (B) The total number of MCs in the skin at the various time points indicated remains unchanged. (C) The percent degranulating MCs in the three compartments of the skin containing MCs, papillary dermis, reticular dermis and hypodermis are comparable. (D) Total number of MCs in the papillary and reticular dermis and hypodermis. Data represent means  $\pm$  SEM,  $n=8-11$  mice per time point from 7 experiments.

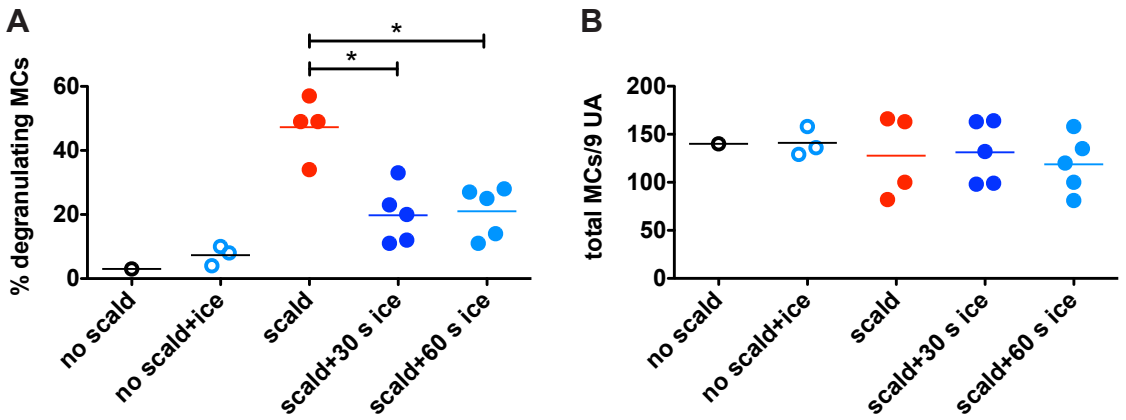

**SUPPLEMENTAL FIGURE 2.** MC degranulation can be inhibited by cooling. (A) The percent of degranulating MCs decreases when the scald area is subjected to 1°C immediately after scalding for 30 s or 60 s. (B) The total number of MCs does not change. Data represent means, each dot is a separate mouse, data from 2 separate experiments.
